# Supplementary material for: Colorimetric Assay for Determination of Lead (II) Based on Its Incorporation into Gold Nanoparticles during Their Synthesis
Source: Sensors (Basel). 2010 Dec 7;10(12):11144–55. doi: 10.3390/s101211144 (PMC3231069; doi:10.3390/s101211144)

## Supplemental Information

**Figure S1.** Kinetics of the absorbance maxima in aqueous solution of the formed Au-NPs in the presence of  $5.0 \times 10^{-7}$  M  $\text{Pb}^{2+}$ .

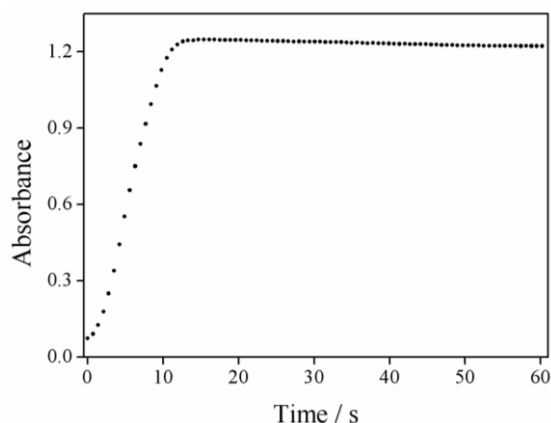

**Figure S2.** Fluorescence emission spectra of gallic acid ( $1.0 \times 10^{-4}$  M, pH 4.5) interacted with different concentration  $\text{Pb}^{2+}$  (0 M,  $1.0 \times 10^{-5}$  M,  $5.0 \times 10^{-5}$  M,  $1.0 \times 10^{-4}$  M,  $5.0 \times 10^{-4}$  M,  $1.0 \times 10^{-3}$  M).  $\lambda_{\text{ex}} = 212$  nm. Excitation and emission slit widths were set at 5.0 nm and 10.0 nm, respectively.

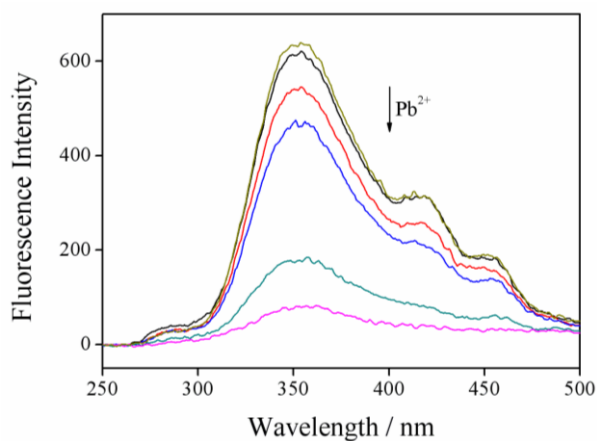

**Figure S3.** Plots of the relationship between the shift of the absorption band ( $\Delta\lambda_{\text{Max}}$ ) and time over 4 h at different concentrations of  $\text{Pb}^{2+}$  (1,  $1.0 \times 10^{-6}$  M; 2,  $5.0 \times 10^{-7}$  M; 3,  $1.0 \times 10^{-7}$  M; 4,  $5.0 \times 10^{-8}$  M).

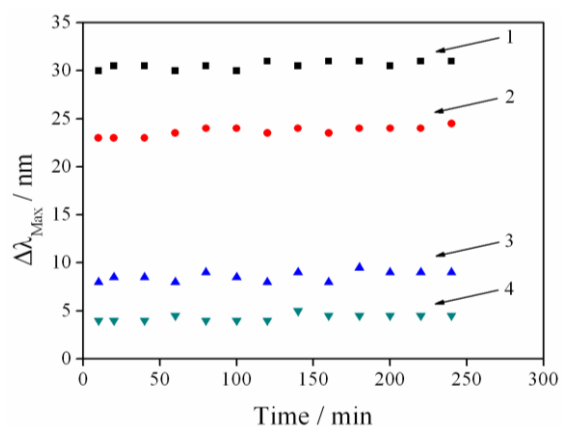

**Figure S4.** A plot of  $A_{600}/A_{541}$  ratios against the concentration of  $\text{Pb}^{2+}$  in the range of  $0\text{--}1.0 \times 10^{-6}$  M.

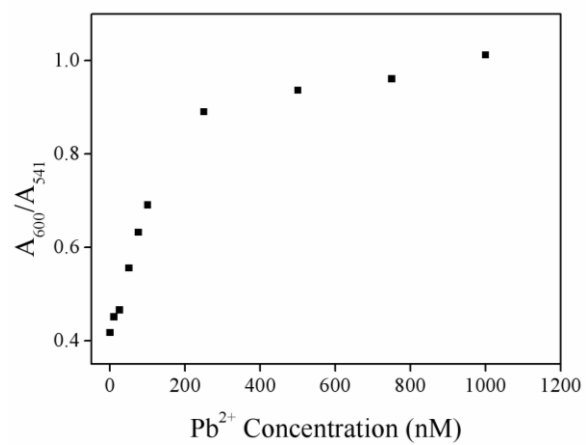

Supplement: Supplementary file 1 [file sensors-10-11144-s001.pdf]
